# Supplementary material for: Catalytic lignin valorization over HSZ-supported CuNiAl-based catalysts with microwave heating
Source: Royal Society of Chemistry journal article supplement (doi:10.1039/d0nj05371f), 2021-01-01
Supplement: d0nj05371f1.pdf [file d0nj05371f1.pdf]

## Catalytic lignin valorization over HSZ-supported CuNiAl-based catalysts with microwave heating

Peng Liu <sup>ac</sup>, Changzhou Chen <sup>ac</sup>, Minghao Zhou <sup>b\*</sup>, Haihong Xia <sup>ac</sup>, Jing Li <sup>ac</sup>,

Brajendra K Sharma <sup>d</sup>, Jianchun Jiang <sup>ac</sup>

- a. Institute of Chemical Industry of Forest Products, Chinese Academy of Forestry; Key Lab. of Biomass Energy and Material, Jiangsu Province; National Engineering Lab. for Biomass Chemical Utilization; Key and Open Lab. on Forest Chemical Engineering, SFA, Nanjing 210042, China*
- b. School of Chemistry and Chemical Engineering, Yangzhou University, Yangzhou 225002, China*
- c. Co-Innovation Center of Efficient Processing and Utilization of Forest Resources, Nanjing Forestry University, Nanjing 210037, China*
- d. Illinois Sustainable Technology Center, Prairie Research Institute, one Hazelwood Dr., Champaign, University of Illinois at Urbana-Champaign, IL 61820, USA*

\* Corresponding Author: E-mail: [zhouminghao@yzu.edu.cn](mailto:zhouminghao@yzu.edu.cn) (Minghao Zhou)

Table S1 ICP results of CuNiAl/HSZ catalysts

| Catalyst   | Sample quality $m_0$ (g) | Constant volume $V_0$ (mL) | Element | Element concentration $C_0$ (mol/L) | The amount of elemental matter (mol) |
|------------|--------------------------|----------------------------|---------|-------------------------------------|--------------------------------------|
| HT/HSZ-640 | 0.0591                   | 10                         | Al      | 0.44                                | 0.0044                               |
|            | 0.0591                   | 10                         | Cu      | 0.31                                | 0.0031                               |
|            | 0.0591                   | 10                         | Ni      | 0.94                                | 0.0094                               |
| HT/HSZ-660 | 0.0955                   | 10                         | Al      | 0.39                                | 0.0039                               |
|            | 0.0955                   | 10                         | Cu      | 0.27                                | 0.0027                               |
|            | 0.0955                   | 10                         | Ni      | 0.91                                | 0.0091                               |
| HT/HSZ-690 | 0.0559                   | 10                         | Al      | 0.45                                | 0.0045                               |
|            | 0.0559                   | 10                         | Cu      | 0.34                                | 0.0034                               |
|            | 0.0559                   | 10                         | Ni      | 0.92                                | 0.0092                               |

Table S2 Si/Al molar ratio before and after CuNiAl mix-oxide incorporation

| Catalysts           | HSZ-640 | HSZ-660 | HSZ-690 |
|---------------------|---------|---------|---------|
| Si/Al ratio(before) | 17      | 28      | 241     |
| Si/Al ratio(after)  | 18      | 30      | 240     |

Table S3 CO<sub>2</sub>-TPD result of CuNiAl-HT and CuNiAl/HSZ materials

| Catalyst   | Temperature at maximum (°C) | Quantity(mmol/g) |
|------------|-----------------------------|------------------|
| CuNiAl-HT  | 109.4                       | 0.0772           |
| HT/HSZ-640 | 102.7                       | 0.0713           |
| HT/HSZ-660 | 93.5                        | 0.0561           |
| HT/HSZ-690 | 91.7                        | 0.0807           |

Table S4 Effect of basic catalysts on molecular weights and HHV of bio-oil

| Entry | Catalysts               | MW             |                | Elemental composition (wt.%) |       |       |      |      |      |      | HHV   |
|-------|-------------------------|----------------|----------------|------------------------------|-------|-------|------|------|------|------|-------|
|       |                         | M <sub>n</sub> | M <sub>w</sub> | C                            | H     | O     | N    | S    | O/C  | H/C  |       |
| 1     | HT/HSZ-660 <sup>a</sup> | 485.3          | 628.8          | 49.65                        | 13.53 | 36.52 | 0.19 | 0.11 | 0.55 | 3.27 | 30.15 |
| 2     | HT/HSZ-660 <sup>b</sup> | 492.1          | 639.2          | 48.82                        | 12.53 | 39.52 | 0.10 | 0.13 | 0.61 | 3.06 | 28.17 |

Reaction conditions: a- metal mixtures supported on acidic HSZ; b-metal mixtures supported on basic HSZ, HT (Cu/Ni/Al ratio of 1.5:4.5:2); HHV (MJ/kg) = (34C+124.3H+6.3N+19.3S-9.8O)/100, where C, H, N, S, and O are the weight percentages of carbon, hydrogen, nitrogen, sulfur, and oxygen.

Table S5 Effect of Cu in CuNiAl-HT/HSZ-660 catalyst

| Entry | Catalysts         | MW             |                | Elemental composition (wt.%) |       |       |      |      |      |      | HHV  |
|-------|-------------------|----------------|----------------|------------------------------|-------|-------|------|------|------|------|------|
|       |                   | M <sub>n</sub> | M <sub>w</sub> | C                            | H     | O     | N    | S    | O/C  | H/C  |      |
| 1     | CuNiAl-HT/HSZ-660 | 485.3          | 628.8          | 49.6                         | 13.53 | 36.52 | 0.19 | 0.11 | 0.55 | 3.27 | 30.1 |
|       | 5                 |                |                | 5                            |       |       |      |      |      |      |      |
| 2     | NiAl-HT/HSZ-660   | 501.1          | 645.2          | 49.8                         | 12.78 | 38.65 | 0.18 | 0.12 | 0.60 | 3.09 | 28.2 |
|       | 0                 |                |                | 2                            |       |       |      |      |      |      |      |

Table S6 Mass balance of reaction <sup>a</sup>

| Catalyst   | Bio-oil | Char  | Gas product |
|------------|---------|-------|-------------|
| HT/HSZ-660 | 0.83g   | 0.15g | 0.02g       |

<sup>a</sup> Reaction condition: 1 g lignin, 0.05 g catalyst and 4 g solvent. In the end of the reaction, the mixture including of solvent, bio-oil and solid residue was concentrated on the rotary evaporator to remove the solvent.

Table S7 Chemical and physical properties of calcined HT/HSZ-640, HT/HSZ-660 and HT/HSZ-690.

| Catalyst                                              | HT/HSZ-640 | HT/HSZ-660 | HT/HSZ-690 |
|-------------------------------------------------------|------------|------------|------------|
| $S_{\text{BET}}^{\text{a}}$ ( $\text{m}^2/\text{g}$ ) | 168.8      | 173.4      | 177.3      |
| Mean pore size <sup>a</sup> (nm)                      | 15.7       | 16.4       | 16.2       |
| Average metal size <sup>b</sup> (nm)                  | 14.8       | 14.5       | 14.2       |
| Cu/Ni ratio <sup>c</sup>                              | 0.1965     | 0.2478     | 0.3247     |
| (Cu+Ni)/Al ratio <sup>c</sup>                         | 2.96       | 2.95       | 2.95       |
| Al (wt%)                                              | 4.7        | 4.9        | 4.9        |
| Cu (wt%)                                              | 2.9        | 2.8        | 3.1        |
| Ni (wt%)                                              | 9.8        | 9.7        | 9.6        |

a-Evaluated from  $\text{N}_2$  adsorption-desorption isotherms; b-Calculated by TEM; c-Calculated by ICP analysis.

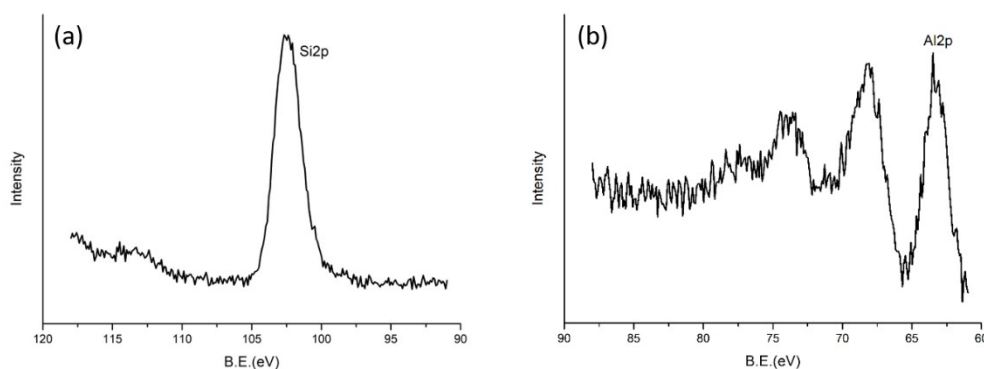

Fig. S1 XPS analysis for CuNiAl-HT/HSZ-600 catalyst (a) Si2p, (a) Al2p.

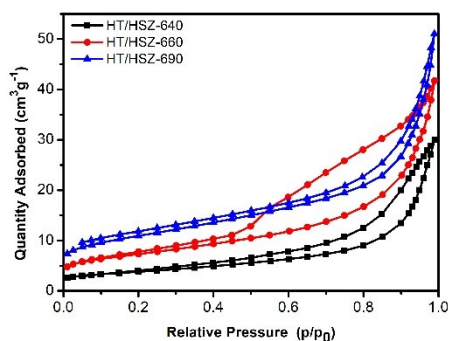

Fig. S2  $\text{N}_2$  adsorption isotherms of HT/HSZ-640, HT/HSZ-660 and HT/HSZ-690.
